# Supplementary material for: The ‘Photosynthetic C1 pathway’ links carbon assimilation and growth in plants
Source: Research Square preprint supplement (doi:10.21203/rs.3.rs-4116025/v1), 2024-04-19
Supplement: Supplementary file 1 [file 14cd89f3e1bdcca6c2f16d25.xlsx]

## Sheet: SupplementarytableX
Protein_ID	Official_name_NCBI	Category	Sequence
3055.A8JH37	Chlamydomonas reinhardtii	Green algae	MAAMLSTTTIGFPRIGNQRQLKFAMESYFKGDSGEAELLAVAHKVQSDAWALQKAAGIAVIGLDGTLYDQVLDTITWLGAIPPRFKHLSGLQRYYAMARGGAALDMSKFFDTNYHYLVPELGPDVLGPATAAGAPLQPDFSGPLDKLARGQAVVGRERAVPILIGPVTFVSLSRGCELPLDQAVARLLPTYCALLQQLAAAGAPEVQLHEPVLATSEGAGMRAEFETAYAQMAQAAGSVPLHLVTYYDDLGAAYPWAVQLPVAAVTLDFLGPPGAAVPSQTLALLQQHGFPADKRLGAGVVDGRSVWKDDGTAVALLRALLDTGAVSSDRLVVTSSAPLQHLPYDLGLELEAPKTPEAEPHLPPALAARLGFAKQKVEEIVSVARLAASPAAAAAAAGH…
3075.A0A087SBU8	Auxenochlorella protothecoides	Green algae	MVSTQISSATIGFPRIGPNREMKKALESFWSGKSTADDLRTVAEQTERVAWLSQKDAGLDLVALDSTYYDQILDFITYLGLIPKRFQHLEPGFAQYFAMARGVHGAHALDMQKFFDTNYHYMVPELEASPAVEADWSGLLAKVERGQAVLGSDVAVPILIGPITLVSLARYPEGTDASALVGALLPAYVEVLGRLKALGVPEVQMHEPVLALGTANELQADFESSYSQLAGVGVPLNLVVYYDDVEEDVYSWLVRLPVQAISLDFCAVPGAAHGCATAATIARLGFPEDKRLGAGIVDGRSIWRDDGTAVDLLAALRARLGPNQAIVVQSSAPLLHLPYDVRAEKNLPGELTARLAFALQKLEEIVAVAKSGSGTAPPALETFGAAFPSDEGRSGIDAS…
3218.A0A2K1KWE4	Physcomitrella patens	Moss	MARGNKTKPVIEMTKWFDTNYHHIVPELSGETKFIYSSHKAVSEYKEAKELGIDTVPVLVGPVTYLLLSKGDKSAPKGFDTLSLLDAILPVYKEVITELKEAGASWIQLDEPKLVMDLEAAQFEAFKKAYAVLGELPGVKLLVKMYFTDLPSKAYQTLCELPIAGFGVDLVRYNVLVSTSCSLLHCAVDLKNETKLDVELKSWMAFAAQKLLEVVAIAKVVSGEKDEEFFSANAIALESRRNSPRVHNKAVKELAATLAGSELRRATSVSHRLEEQQKYLSLPILPTTTIGSFPQTPELRRVRREVKSRKISEEDYDKAIKAEIDSVVKLQEELDIDVLVHVEPERNDMVEYFGEQLNGFCFSANGWVQSYGSRCVKPSIIFGDVSRSMAMTVYWSTYA…
3218.A9RT52	Physcomitrella patens	Moss	MASHVVGYPRMGPKRELKFALESMWDGKTQAADLEQVAKDLRASIWKQMAEAGVSMIPSNTFSYYDQVLDTTAMVGAVPARYEWTGGEIGHDVYFSMARGNKTKPAMEMTKWFDTNYHYIVPELSSETKFMYSSRKAVSEYKEAKALGVDTVPVLVGPVTYLLLSKGDKSAPKGFDTLSLLDAILPVYKEVITELKEAGASWIQLDEPKLVMDLEAAQYEAFKKAYAVLGELSGVKLLLETYFTDLPAEAYKTLCGLPISGFGVDLVRGSKTLSIIHEQGLPAGKTLFAGVVDGRNIWANDLAASVAVVEELQAKLGKENVVVSTSCSLLHSAVDLKNETKLDSELKSWMAFAAQKLLEVVAIAKAVSGEKDEEFFSANAAAQASRRNSPRVHNKAVKE…
3218.A9RWS2	Physcomitrella patens	Moss	MASHVVGYPRMGPKRELKFALESMWDGKTQAADLEQVAKDLRASIWKQMSEAGVSMIPSNTFSYYDQVLDTTAMVGAVPSRYEWTGGEIGHDVYFSMARGNKTKPAMEMTKWFDTNYHYIVPELSGETKFVYSSRKAVSEYNEAKALGIDTVPVLVGPVTYLLLSKGDKSAPKGFNTLSLLDAILPVYKEAITELKGAGASWIQLDEPKLVMDLESAQYEAFKKAYAVLSEVSGVKLLVETYFTDLPVEAYKTLCDLPIAGFGVDLVRGSKTLAVIKEHALPTGKTLFAGVVDGRNIWANDLAASVNTVKELQASLGKDNVVVSTSCSLLHSAVDLKNETKLDNELKSWMAFAAQKLVEVVAIANAVSGNKDEEYFAANAAAQASRRNSPRVHNKAVKE…
3218.A9U0A5	Physcomitrella patens	Moss	MTSHVVGYPRMGPKRELKFALESMWDGKTQAADLEQVAKDLRASIWKQMSEAGVSMIPSNTFSYYDQVLDTTAMVGAVPARYGWTGGEIGHDVYFSMARGNKTKPAMEMTKWFDTNYHYIVPELSGETKFVYSSRKAVSEYKEAKELGVDTVPVLIGPVTYLLLSKGDKSAPKGFNTLSLLDAILPVYKEVITELKEAGASWIQLDEPKLVMDLEASQYEAFKKAYAVLGEVAQVKLLVETYFTDLPAEAYKTLCDLPIAGFGVDLVRGNKTLSLIKEHGLPEGKTLFAGVVDGRNIWANDLAASVAVVEELQAKLGKDNVVVSTSCSLLHSAVDLKNETKLDSELKSWMAFAAQKLLEVVAVAKAVSGQKDEAFFAANASAQESRRNSPRVHNKAVKE…
3469.A0A4Y7JC28	Papaver somniferum	Land Plants	MEKARIQENPKNELETKKKKKGIEIEGYPIEGISIGGQETCIIFPSLKIAFDIGRCPQRAVSQDYLFISHGHLDHIGGLPMYVATRGLFKMQPPTIFIPSSIGKDVKSLFEVYRNLDGADLNHNLVVMDVGEEKELRKDLKVKAFKTYHRVPSQGYVIYSVKHKLKPEYVGLPGKKLKSLKESGVQCTYVNDAQSVKHAKEYGHTHLSEIVEHVDKFKNKAILLIHFSARHEVAEIEAAVSKLPTSIAALQIQSYLQLICPLRPKSSRCEMAAVLVRNMLRLKPSFFSGTLHHFSFLLPSAPPPRFINPSYVRVSRIRAMSSHIVGYPRIGPKRELKFALESFWDGKTDAEELQKVAKDIRVSMWKQMASAGTKFIPSNTFSYYDQVLDTTAMLGAVPP…
3469.A0A4Y7JL57	Papaver somniferum	Land Plants	MARGNAVVPAMEMTKWFDTNYHFIVPELSPDLKFTYASHKAVVEYKEAKEHGIETVPVLVGPVSYLLLSKPAKGVDKSFSPLSLLGKIIPIYKEVLAELKAAGATWVQFDEPTLVLDLESHQLKAFIDAYEQLEETLSGISVILETYFADLPADAYKMVTSLKAVSAIGLDLVRGEKTLELIKNLGFPSDKYLFAGVVDGKNIWANDLEASLEMLKTLESIVGKEKLMVSTSCSLMHTAVDLLNETKLADEIKSWLAFAAQKILEVNALANALAGEKDGELFSANSAAQESRKSSARVNDEAVQEAASALRGSDHRRATPVTARLEAQQRKLNLPMLPTTTIGSFPQTMDVRRLRREYKTNKITEEEYVEAIKEEIKKVVKIQEELDIDVLVHGEPERN…
3469.A0A4Y7L0F0	Papaver somniferum	Land Plants	MASHIVGYPRMGPKRELKFALESFWDGKSTAEDLQKVATDLRCSIWKQMADAGTKYIPSNTFAYYDQVLDTTAMVGAVPARYNWNGGEIGFDTYFSMARGNATIGAMEMTKWFDTNYHFIVPELSAETKFSYASHKAVSEYKEAKALGIDTVPVLVGPVSYLLLSKPAKGAEKSFSCLSLLGSLLPVYKEVIAELKAAGASWIQFDEPTLVMDLDAEKLSAFTDAYSQLESTLSGLNVIVETYFADLPAEAYKTLTSLKCVTGFGFDLVRGAKTLDLIKSGFPSGKYLFAGIVDGRNIWANDLASSLETLTALEGIVGKDKLVVSTSCSLLHTAVDLVNETKFDQELKSWMAFAAQKVLEVNALAKALTGQKDEAFFSANAAAQASRKSSPRVTNESVQ…
3469.A0A4Y7L0T4	Papaver somniferum	Land Plants	MGKRRIEIQKIEDRKKRNVSFTKRRQGLFKKAAELCRLTVLVLVGRAILLPPKPAKDAEKSFSCLSLLGSILPIYYKEVIAELKAAGASWIQFDEPKLVMHLDTGKLNAFTDADSQLKSTLSEYVLNRRVFTYDYVTESIAPHLGLDDPTNISLTPHNYCSQQPIAQAIKYQGFDHLSEILSFTDLDFQAKILGEEKNLGPRDCLVYVYHFIEDASEIQKCSVVRL
3469.A0A4Y7L2T5	Papaver somniferum	Land Plants	MASHIVGYPRMGPKRELKFALESFWDKKTTAEDLEKVATDLRSSIWKQMAGAGIKYIPSNTFSYYDHMLDTTAMLGAVPSRYNWTGGEIGFDTYFSMARGNATLPAMEMTKWFDTNYHFIVPELGPEVKFSYASHKAVKEYKEAKALGVETVPVLVGPVSYLLLSKPAKGVDKSFSLLSLLGSILPVYKEVVAELKAAGASWIQFDEPTLVLDLEAHQLEAFTQAYAELEVTLSGLNVLVETYFADVPAAAYKTLTALKGVTGFGFDLVRGEKTLELIKSDFPSGKYLFAGLVDGRNIWANDLAGSLSTLQALEAVAGKDNLVVSTSCSLLHTAVDLVNEPKLDKEIKSWLAFAAQKIVEVNALATALAGKKDEEIFSTNAAAQATRKSSPRVTNEAVQ…
3469.A0A4Y7LBL7	Papaver somniferum	Land Plants	MLGIDTVLVLVGPAILLLPKPAKDAEKSFSCLSLLGSIVPVYKEVIAELKAAGASWIQLDEPKLVMDLAARKLNAFSDAFSRLKSTLSGLTVIVETYFAGLLAKAYKTLTSLKMCHRFWI
3469.A0A4Y7LBN7	Papaver somniferum	Land Plants	MGKRRIEIKKIEDRKKRNVAFTKRRHGLFKKAADLCQLTGADISLLELIQSQSLLALQSCCYQNLSRMLSNPSLASPFSEALFQSTSKENLFREVIAELKAAGASWVQFDESALVMDLDAEKLNAFTDAYSQLKSTPTGLNVIVET
3469.A0A4Y7LE77	Papaver somniferum	Land Plants	MASHIVGYPRMGPKRELKFALESFWDGKSTAEDLQKVAADLRCSIWKQMADAGTKYIPSNTFAYYDQVLDTTAMVGAVPARYNWNGGEIGFDTYFSMARGNATIGAMEMTKWFDTNYHFIVPELSAETKFSYASHKAVSEYKEAKALGIDTVPVLVGPVSYLLLSKPAKGAEKSFSCLSLLGSLLPVYKEVIAELKAAGASWIQFDEPTLVMDLDAEKLSAFTDAYSQLESTLSGLNVIVETYFADLPAEAYKTLTSLKCVTGFGFDLVRGAKTLDLIKSGFPSGKYLFAGIVDGRNIWANDLASSLETLTALEGIVGKDKLVVSTSCSLLHTAVDLVNETKFDQELKSWMAFAAQKVLEVNALAKALTGQKDEAFFSANAAAQASRKSSPRVTNESVQ…
3469.A0A4Y7LFN7	Papaver somniferum	Land Plants	MASHIVGYPRMGPKRELKFALESFWDKKTTAEDLEKVATDLRSSIWKQMAGAGIKYIPSNTFSYYDHMLDTTAMLGAVPSRYNWTGGEIGFDTYFSMARGNATLPAMEMTKWFDTNYHFIVPELGPEVKFSYASHKAVKEYKEAKALGVETVPVLVGPVSYLLLSKPAKGVDKSFSLLSLLGSILPVYKEVVAELKASGASWIQFDEPTLVLDLEAHQLEAFTQAYAELEVTLSGLNVLVETYFADVPAAAYKTLTALKGVTGFGFDLVRGEKTLELIKSDFPSGKYLFAGLVDGRNIWANDLAGSLSTLQALEAVAGKDNLVVSTSCSLLHTAVDLVNEPKLDKEIKSWLAFAAQKIVEVNALATALAGKKDEEIFSTNAAAQATRKSSPRVTNEAVQ…
3694.A0A2K1R7U9	Populus trichocarpa	Land Plants	MASHIVGYPRMGPKRELKFALESFWDGKSSAEDLQKVAADLRESIWKQMADTGIKYIPSNTFSYYDQMLDTTAMLGAVPPRYGWNGGEIGFDVYFSMARGNASVPAMEMTKWFDTNYHFIVPELGPDVKFSYASHKAVTEYKEAKALGVDTVPVLIGPVSYLLLSKPAKGVEKSFSLLSLLGKILPIYMEVISELKEAGASWIQFDEPTLVMDLESHKLQAFTGAYSALESTLSGLNVLIETYFADIPAEQYKTLTSLKGVTAFGFDLVRGNKTLDLIKGDFPEGKYLFAGVVDGRNIWANDLAASFSTLETLEGIVGKDKLVVSTSCSLLHTAVDLVNETKLDKEIKSWLAFAAQKVVEVNALAKALAGQKDEEIFSANAAALASRKSSPRVNNEAVQ…
3694.A0A2K1Z8B4	Populus trichocarpa	Land Plants	MNQVSQHILAPFTSLRVISVGSLSFPSSFTPTNSNSPPFLLRYFSVRAMASHVVGYPRMGPKRELKFALESFWDGKSSAEDLQNVAAELRSSIWKQMSDAGIKFIPSNTFSCYDQVLDTTAMLGAVPPRYGWNGGEIGFDVYFSMARGNASVPAMEMTKWFDTNYHYIVPELGPEVNFSYASHKAVIEYKEAKALGVDTVPVLVGPVSYLLLSKPAKGVEKSFSLLSLIDKILPVYQEVVAELKAAGATWIQFDEPKLVMDLGAHELQAFTHAYSALEASLSGLNVLIETYFADVPVEAYKTLISLKCVTGFGFDLVRGTKTLDLIKGGFPSGKYLFAGVVDGRNIWANDLASSLSVLHALEGIVGKDKLVVSTSCSLLHTAVDLVNEPKLDKEIKSWL…
3694.B9I615	Populus trichocarpa	Land Plants	MASHIVGYPRMGPKRELKFALESFWDGKSSAEDLQKVAADLRESIWKQMTDAGIKYIPSNTFSYYDQMLDTTAMLGAVPPRYGWNGGEIGFDVYFSMARGNASVPAMEMTKWFDTNYHFIVPELGPDVNFSYASHKAVTEYKEAKALGVDTIPVLIGPVSYLLLSKPAKGVEKTFSLLSLLGKILPIYKEVISELKEAGASWIQFDEPTLVMDLESHKLEAFTEAYSELESTVSGLNVLIETYFADIPAKQYKTLTSLKGVTALGFDLVRGTKTLDLIKGEFPKGKYLFAGVVDGRNIWANDLAASLSTLVALEGIVGKDKLVVSTSCSLLHTAVDLVNETKLDKEIKSWLAFAAQKVVEVNALAKALAGEKDEEFFSANVAAHTSRKSSPRVNNEAVQ…
3694.B9IPT1	Populus trichocarpa	Land Plants	MASHIVGYPRMGPKRELKFALESFWDGKSSAEDLQKVAADLRESIWKQMADTGIKYIPSNTFSYYDQMLDTTAMLGAVPPRYGWNGGEIGFDVYFSMARGNASVPAMEMTKWFDTNYHFIVPELGPDVKFSYASHKAVTEYKEAKALGVDTVPVLIGPVSYLLLSKPAKGVEKSFSLLSLLGKILPIYKEVISELKEAGASWIQFDEPTLVMDLESHKLQAFTGAYSALESTLSGLNVLIETYFADIPAEQYKTLTSLKGVTAFGFDLVRGTKTLDLIKGDFPKGKYLFAGVVDGRNIWANDLAASFSTLETLEGIVGKDKLVVSTSCSLLHTAVDLVNETKLDKEIKSWLAFAAQKVVEVNALAKALAGQKDEEIFSANAAALASRKSSPRVNNEAVQ…
3694.U5GG57	Populus trichocarpa	Land Plants	MNRLSHHILAPFSSHRVIPLRSLSFSASFTATNSHSPPSLLRFSFRSFSIRAMASHIVGYPRMGPKRELKFALESFWDGKSSAEDLQKVAADLRSSIWKQMSDAGIKFIPSNTFSCYDQVLDTTAMLGAVPPRYGWNGGEIGFDVYFSMARGNASVPAMEMTKWFDTNYHYIVPELGPEVNFSYASHKAVNEYKEAKALGVDTVPVLVGPVSYLLLSKPAKGVEKSFSLLSLIDKILPVYQEVLAELKAAGASWIQFDEPKLVMDLGAHELQAFTHAYSALEASLSGLNVLVETYFADVPVEAYKTLTSLKSVTGFGFDLVRGTKTLELIKGGFPSGKYLFAGVVDGRNIWANNLGSSLDTLKALEGIVGKDKLVVSTSCSLLHTAVDLVNEPKLDKEI…
3702.O50008	Arabidopsis thaliana	Land Plants	MASHIVGYPRMGPKRELKFALESFWDGKSTAEDLQKVSADLRSSIWKQMSAAGTKFIPSNTFAHYDQVLDTTAMLGAVPPRYGYTGGEIGLDVYFSMARGNASVPAMEMTKWFDTNYHYIVPELGPEVNFSYASHKAVNEYKEAKALGVDTVPVLVGPVSYLLLSKAAKGVDKSFELLSLLPKILPIYKEVITELKAAGATWIQLDEPVLVMDLEGQKLQAFTGAYAELESTLSGLNVLVETYFADIPAEAYKTLTSLKGVTAFGFDLVRGTKTLDLVKAGFPEGKYLFAGVVDGRNIWANDFAASLSTLQALEGIVGKDKLVVSTSCSLLHTAVDLINETKLDDEIKSWLAFAAQKVVEVNALAKALAGQKDEALFSANAAALASRRSSPRVTNEGVQ…
3702.Q0WNZ5	Arabidopsis thaliana	Land Plants	MGQLALQRLQPLASLPRRPPSLPPPSSATPSLPCATASRRPRFYVARAMSSHIVGYPRIGPKRELKFALESFWDGKTNVDDLQNVAANLRKSIWKHMAHAGIKYIPSNTFSYYDQMLDTTAMLGAVPSRYGWESGEIGFDVYFSMARGNASAHAMEMTKWFDTNYHYIVPELGPDVNFSYASHKAVVEFKEAKALGIDTVPVLIGPMTYLLLSKPAKGVEKSFCLLSLIDKILPVYKEVLADLKSAGARWIQFDEPILVMDLDTSQLQAFSDAYSHMESSLAGLNVLIATYFADVPAEAYKTLMSLKCVTGFGFDLVRGLETLDLIKMNFPRGKLLFAGVVDGRNIWANDLSASLKTLQTLEDIVGKEKVVVSTSCSLLHTAVDLVNEMKLDKELKSWL…
3702.Q9SRV5	Arabidopsis thaliana	Land Plants	MASHIVGYPRMGPKRELKFALESFWDGKSSADDLQKVSADLRSDIWKQMSAAGIKYIPSNTFSHYDQVLDTTAMLGAVPSRYGFTSGEIGLDVYFSMARGNASVPAMEMTKWFDTNYHYIVPELGPEVKFSYASHKAVNEYKEAKALGVETVPVLVGPVSYLLLSKLAKGVDKSFDLLSLLPKILPVYKEVIAELKAAGASWIQLDEPLFVMDLEGHKLQAFSGAYAELESTLSGLNVLVETYFADIPAEAYKTLTSLKGVTAFGFDLVRGTKTIDLIKSGFPQGKYLFAGVVDGRNIWANDLAASLITLQSLEGVVGKDKLVVSTSCSLLHTAVDLINETKLDAEIKSWLAFAAQKVVEVDALAKALAGQTNESFFTANADALSSRRSSPRVTNESVQ…
3708.A0A078FUC7	Brassica napus	Land Plants	MAVGSYLIPFSFFSVSRSRHLRRSHPLQQELERLNIDNLHTWEPKRSSRVCEGAVTSVEARPEADQRRQEREREREKHPKHMAEATAPPADTWEQTTQKMVAVLVLTETSQLLWSMNQSPIVFVNNRSSLKKGKTIRMGQRALQRVPPSLPSRTPSLPPPSSSSPSLRCAPSSRRPLRPRAMSSHIVGYPRIGPKRELKFALESFWDGKTGAEDLQNVAADLRRSIWKHMAGVGIKYIPSNTFSYYDQMLDTTAMLGAVPSRYGWESGEVGFDVYFSMARGNDSVPAMEMTKWFDTNYHYIVPELGPSVKFSYASHKAVEEFKEAKALGIDTVPVLIGPMTYLLLSKPAKDVDKSFCLLSLIDKILPVYKEVLTDLKSAGARWIQFDEPILVMDLDTNQ…
3708.A0A078GJY6	Brassica napus	Land Plants	MASHIVGYPRMGPKRELKFALESFWDGKSTAEDLQKVSADIRSGIWKQMSEAGTKYIPSNTFAHYDQVLDTTAMLGAVPPRYGYTSGEIGLDVYFSMARGNASVPAMEMTKWFDTNYHYIVPELGPDVKFSYASHKAVNEYKEAKALGVDTVPVLVGPVSYLLLSKAAKGVEKSFDLLSLLPKILPVYKEVITELKAAGATWIQLDEPVLVMDLEGHKLQALTGAYAELESTLSGLNVLVETYFADIPAEAYKTLTSLKGVTAFGFDLVRGTKTLDLVKAGFPEGKYLFAGVVDGRNIWANDFAASLSTLEALEGVVGKDKLVVSTSCSLLHTAVDLVNETKLDDEIKSWLAFAAQKIVEVNALAKALAGQKDEALFSANAAALASRRSSPRVTNEGVQ…
3708.A0A078HJ36	Brassica napus	Land Plants	MASHIVGYPRMGPKRELKFALESFWDGKSTAEDLQKVSADLRANIWKQMSEAGTKYIPSNTFAHYDQVLDTTAMLGAVPPRYGYTSGEIGLDVYFSMARGNASVPAMEMTKWFDTNYHYIVPELGPDVKFSYASHKAVNEYKEAKALGVDTVPVLVGPVSYLLLSKAAKGVEKSFDLLSLLPKILPVYKEVITELKAAGATWIQLDEPVLVMDLEGHKLQAFTVAYAELESTLSGLNVLVETYFADIPAEAYKTLTSLKGVTAFGFDLVRGTKTLDLVKAGFPEGKYLFAGVVDGRNIWANDFAASLSTLEALEGVVGKDKLVVSTSCSLLHTAVDLVNETKLDDEIKSWLAFAAQKIVEVNALAKALAGQKDEALFSANAAALASRRSSPRVTNEGVQ…
3708.A0A078IL69	Brassica napus	Land Plants	MASHIVGYPRMGPKRELKFALESFWDGKSTAEDLQKVSADLRSDIWKQMSSAGIKYIPSNTFAYYDQVLDTTAMLGAVPPRYGWNSGEIGFDVYFSMARGNASVPAMEMTKWFDTNYHYIVPELGPEVKLSYSSHKAVNEYKETKALGVETVPVLVGPVSYLLLSKLAKGVDKSFDLLSVLPKVLPIYKEVIAELKGAGATWIQFDEPLFVMDLEGHKLQAFSGAYAELESTLSGLNGVTAFGFDLIRGTKTIDLIKSSFPQGKYLFAGVVDGRNIWANDLAASLITLQSLEGIVGKDKLVVSTSCSLLHTAVDLVNETKLDAEIKSWLAFAAQKVVEVDALAKALAGQKNESFFSANAAALSSRRSSPRVTNESVQKAAAALKGSDHRRATEVNARLD…
3750.A0A498I2K2	Malus domestica	Land Plants	MPTEMASHIVGYPRMGPKRELKFALESFWDGKSSAEDLQKVSADLRSSIWKQMTDAGIKHIPSNTFSYYDQVLDTTALLGAVPPRYGWNGGEIGFDTYFSMARGNASVPAMEMTNHFIVPELGPDVNFSYASHKAVEEYKEAKALGVDTVPVLVGPVSYLLLSKPAKGVEKTFSLLSLLPKILLVYKEVVSELKAAGASWIQFDEPTLVLDLESDKLQAFTDAYSELESTLSGLNVLIETYFADVPAAAFKILTSLKGVNAYGFDLVRGTKTLDLIKSEFPKGKYLFAGLVDGRNIWANDLSASLSTLLTLEGIVGKGIQLFVRADKLVVSTSTSLLHTAVDLVNETKLDQEIKSWLAFAAQKIVEVNALAKALAGHKDEAFFSANAAALASRKSSPRV…
3750.A0A498IF69	Malus domestica	Land Plants	MASHIVGYPRMGPKRELKFALESFWDGKSSAEDLQKVSADLRSSIWKQMADAGIKHIPSNTFSYYDQVLDTTALLGAVPPRYGWNGGEIGFDTYFSMARGNASVPAMEMTKWFDTNYHFIVPELGPDVNFSYASHKAVEEYKEAKALGVDTVPVLVGPVSYLLLSKPAKGVEKTFSLLSLLPKILPIYKEVVSELKAAGASWIQFDEPTLVLDLESDKLQAFTGAYSELESALSGLNVLIETYFADVPAAAFKTLTSLKGVTAYGFDLVRGTKTLDLIKSKFPKGKYLFAGVVDGRNIWANDLCASLSTLETLEGIVGKDKLVVSTSTSLLHTAVDLVNETKLDQEIKSWLAFAAQKIIEVNALAKALAGHKDEAFFSANAAAQASRKSSPRVTNEAVQ…
3750.A0A498IPV6	Malus domestica	Land Plants	MEPILPASRDNFELTKMNQVSSISFGPYGSLYLSVKRPTFLRCTHHLHFHTTSTRAVASHIVGLPRIGPKRELKFSLESFWDGKSSAEELQKAAAGLRSSIWKQLADAGIQYIPSNTFSYYDQMLDTTAMLGAVPPRYGWKHSEIGFETYFSMARGNANVPAMEMTKWFDTNYHYIVPELGPHIRFSYASHKAVDEFKEAKALGVDTIPVLIGPVSYLLLSKPARGIEQSFSPLSLLRYILPVYKEVMAELRAAGATWVQFDEPTLVLDLDANQLEAFTHTYSELESSFSGLNVLIETYFSDVTAEAYKTITSLKGVTGYGFDLVRGAKTLDLIKGGFPTGKHLFAGVVDGRNIWANDLASSVNILQALESIVGKDKIVVSTSCSLLHTAVDLENETKL…
3847.A0A0R0FQE0	Glycine max	Land Plants	MRDIPFTIFSSPKDFSAPKFKCPNLIANAFFSSNADAEASRKFSPRVTNEAVQKAAAALKGSDHRRATNVSTRLDAQQKKLNLPILPTTTIGSFPQTVELRRVRREYKANKISEEEYVSSIKEEIRKVVELQENLDIDVLVHGEPERNDMVEYFGEQLSGFAFTVNGWVQSYGSRCVKPPIIYGDVSRPKPMTVFWSSTAQSMTKRPMKGMLTGPVTILNWSFVRNDHPRSETTYQIALAIKDEVEDLEKAGITVIQIDEAALREGLPLRKSEQANYLDWVVHAFRITNVGVQDTTQIHTHMCYSNFNDIIHSIIDMDADVITIENSRSDEKLLSVFREGVKYGAGIGPGVYDIHSPRIPPTDEIADRINKMLAVLEKNILWVNPDCGLKTRKYPEVNP…
3847.A0A0R0FR64	Glycine max	Land Plants	MASHIVGYPRMGPKRELKFALESFWDGKSSADDLKKVAFDLRASIWKQMIDAGIKYIPNNTFSYYDQVLDTTAMLGAVPPRYGWNSEEIGFDTFFSMARGNASVPTMEMTKWFDTNYHFIVPELGPDVNFSYASHKAVNEYKEAKALGVDTVPVLIGPVSYLVLSKPAKGVDKSFCLLSLLPKVLAIYREVVADLKQAGASWIQFDEPILVLDLGSQTLQALTAAYAELESTLSGLNVLIETYFADIPVEAYQTLTALNGVAAFGFDLVRGTKTLDLIKGGFPSGKYLFAGVVDGRNIWANNLTASLDTLNSLEGIVGKAAAKATNSDSIVEFVMQVCFLDAQEIAPPPRRNTQPLVDE
3847.A0A0R4J5Z8	Glycine max	Land Plants	MASHIVGYPRMGPKRELKFALESFWDGKSSAEDLQKVAADLRSSIWKQMAGAGIKYIPSNTFSFYDQLLDATATLGAVPPRYGWTGGEIGFDTYFSMARGNATVPAMEMTKWFDTNYHFIVPELGPDVNFTYASHKAVDEYKEAKALGVDTIPVLVGPVTYLLLSKPAKGVEKSFSLLSLLPKVLAVYKEVIADLKAAGASWIQFDEPTLVLDLESHKLQAFTDAYAELAPALSDLNVLVETYFADIPAEAYKTLTSLNGVTAYGFDLVRGTHTLDLIKGGFPSGKYLFAGVVDGRNIWANDLAASLTTLQGLEGIVGKDKLVVSTSSSLLHTAVDLVNETKLDDEIKSWLAFAAQKIVEVNALAKALSGNKDVAFFSANAAAQASRKSSPRVTNEAVQ…
3847.I1JWK3	Glycine max	Land Plants	MYKLSSIQCVAPFTISLCTLSFSSSSLRFSVRATSSRAMASHIVGYPRMGPKRELKFALESFWDGKSSADDLQKVAADLRSAIWKQMADAGIKYIPSNTFSYYDQVLDTTAMLGAVPSRYNWNGGEIGFDVYFSMARGNSSVPAMEMTKWFDTNYHYIVPELGPDVKFSYASHKVVDEYKEAKVLGINTVPVLVGPVSYLLLSKPAKGVEKSFSLLSLIDKILPVYREVVAELKAAGATWIQFDEPTLVKDLNAHQLQAFTHAYAELESSLSGLNVLIETYFADVPAEAYKTLTSLKAVTAYGFDIVRGTKTLDLIKQGFPSGKFLFAGVVDGRNIWANNFASSLNTLQALGDIVGNDKVVVSTSCSLLHTAVDLVNETKLDQEIKSWLAFAAQKVVEV…
3847.I1LXY1	Glycine max	Land Plants	MYKLSSIQCVAPFTFSLCTLSFSSYSLRFSVRATSSRAMASHIVGYPRMGPKRELKFALESFWDGKSSAEELQKVAADLRSAIWKQMADAGIKYIPSNTFSLYDQVLDTTAMLGAVPSRYNWNGGEIGFDVYFSMARGNASVPAMEMTKWFDTNYHYIVPELGPDVKFSYASHKAVDEFKEAKVLGVNTVPVLVGPVSYLLLSKPAKGVEKSFSLLSLIDKILPVYREVVAELKAAGATWIQFDEPTLVKDLNTHQLQAFTHAYAELESSLSGFNVLIETYFADVPAEAYKTLTSLKAVTAYGFDIVRGTKTLDLIKQGFPSGKFLFAGVVDGRNIWANSLASSLNTLQALGDIVGNDKVVVSTSCSLLHTAVDLVNETKLDQEIKSWLAFAAQKVVEV…
3847.I1MW49	Glycine max	Land Plants	MASHIVGYPRMGPKRELKFALESFWDGKSSADDLKKVASDLRASIWKQMIDAGIKYIPSNTFSYYDQVLDTTAMLGAVPPRYGWNGEEIGFDTFFSMARGNASVPAMEMTKWFDTNYHFIVPELGPDVNFSYASHKAVNEYKEAKALGVDTVPVLIGPVSYLVLSKPAKGVDKSFCLLSLLPKVLAIYKEVVADLKQAGASWIQFDEPILVLDLGSQTLQALTAAYAELESTLSGLNVLIETYFADIPAEAYQTLTALNGVAAFGFDLVRGTKTLDLIKGGFPSGKYLFAGVVDGRNIWANNLTASLDTLNSLEGIVGKDKLVVSTSCSLLHTAVDLVNETKLDNEIKSWLAFAAQKIVEVNALAKALSGQKDEAFFSSNADAQASRKFSPRVTNEAVQ…
3847.K7KK03	Glycine max	Land Plants	MCYSNFNDIIHSIINMDVDVITIENSRSDENLLLVICEGVKYRAGIYDIHSPRIPPTEEIVDRINKMLVVLESNILWVNPDCGLMTRKYTKVKPALTNMVVVIKLICNQLASTK
3847.K7KNT9	Glycine max	Land Plants	MASHIVGYPRMGPKRELKFALESFWEGKSSADDLQKVAADLRASIWKQMTDAGIKYIPSNTFSYYDQMLDTTAMLGAVPPRYGLNNGEIEFDTYFSMARGNASVPAMEMTKWFDTNYHFIVPELGPDVNFTYASHKAVNEYKEAKALGVDTVPVLIGPVSYLVLSKPAKGVDKSFCLLSLLPKVLAIYKEVVADLKEAGASWVQFDEPIFVLDLDSQTLQAFSTAYAELESTLSGLNVLIETYFADITAEAYQTLTALNGVTAFGFDLVRGTKTLDLIKGGFPSGKYMFAGVVDGRNIWANNLAASLDTLNSLEGIVGKDKLVVSTSCSLLHTAVDLVNETKLDNEIKSWLAFAAQKIVEVNALAKALSGQKDEAFFSSNAAAQASRKSSPRVTNEAVQ…
3847.K7MM99	Glycine max	Land Plants	MRYSNCRFSFCNDRAMASHIVGYPHIGPKRELKSALESFWDGKSNKQMDDAGIKYIPSNAFSYYDQVLDTTTMLGAVPPRYNWNCGEIGFDVYFLMARRNAYVPAMEKTKCFDTNYRYIVPELGSDVKFSYASHKVVDEYKEAKVILLVYREVMAELKAAGATWIQFDEPNLVKDLNAHQLQAFTHAYTALESSLSDLFETCYKDEVEDLEKASITVIQIDKATLREGFTNYGVEDTTQIHTHMCYSNFNDIIHPIIDMDVDADVITIHTHISLDLQLR
3847.K7MME4	Glycine max	Land Plants	MRTLGPSLASLAQSSWSLLSNALGGRIASLTLSLSLCLLTFLRFCALALNNHKIRIVTGIDLNNRYVPSGINNFVEASITIKNSRSDEKLLPVFHEGVKYGAGIGPGVYDIHFPRIPPTIETANKINKMLAVLEKNILWVKTDCGLKTRKYTKVKSALTNMVVAAKLIRNELAK
3847.Q71EW8	Glycine max	Land Plants	MASHIVGYPRMGPKRELKFALESFWDGKSSAEDLQKVSSDLRASIWKQMADAGIKYIPSNTFSHYDQVLDATATLGAVPPRYGWTGGEIGFDTYFSMARGNATVPAMEMTKWFDTNYHFIVPELGPDVNFTYASHKAVDEYKEAKALGVDTVPVLVGPVTYLLLSKPAKGVEKSFSLLSLLPKVLAVYKEVIADLKAAGASWIQFDEPTLVLDLESHKLQAFTDAYAELAPALSGLNVLVETYFADIPAEAYKTLTSLNGVTAYGFDLVRGTNTLDLIKGGFPSGKYLFAGVVDGRNIWANDLAASLTTLQGLEGIVGKDKLVVSTSSSLLHTAVDLVNETKLDDEIKSWLAFAAQKIVEVNALAKALSGHKDEAFFSGNAAALASRKSSPRVTNEAVQ…
4081.A0A3Q7E9H1	Solanum lycopersicum	Land Plants	MLTVAKKLSSIYMRLVLPTPSSSTFLSFGSSVSVFSPPRGTQFLRLNFRFRTMASHVVGYPRMGPKRELKFALESFWDGKSNSEDLEKVAADLRLSIWKQMADAGIKYIPSNTFSYYDQVLDTTAMLGAVPPRYGWNGGEIGFDVYFPMARGNASVPAMEMTKWFDTNYHYIVPELGPDVKFSYASHKAVSEYKEAKSLGIDTVPVLVGPVSFLLLSKAAKGVEKSFPLLSLIEKILPVYKEVIAELKAAGASWIQFDEPTLVKDLDSHQLQAFSHAYSELESPLSGLNVLIETYFADVPAEAFKTVTSLKCVTALGFDLVRGSKNLDLIKSGFPSEKYLFAGVVDGRNIWANDLAASLSTLQALENVAPFVCILDTIGHLFSSDKLVVSTSCSLLHTA…
4081.A0A3Q7ILD3	Solanum lycopersicum	Land Plants	MASHVVGYPRMGPKRELKFALESFWDGKSSAEDLKKVSADLRSSIWKQMCDTGIKYIPSNTFSYYDQVLDTTAMLGAVPSRYNWTGGEIEFATYFSMARGNASVPAMEMTKWFDTNYHFIVPELGPDVNFSYASHKAVNEYKEAKAQGVDTVPVLVGPVSYLLLSKPAKGVDKSFPLLSLLDKILPIYKEVIAELKAAGASWIQLDEPTLVLDLESHKLEAFTKAYADLESSLSGLNVLVETYFADVPAEAFKTLTALKGVTAFGFDLVRGTQTLELIKSSFPSGKYLFAGVVDGRNIWANDLAASLALLQTLEGVVGKDKLVASTSCSLLHTAVDLINETKLDDEIKSWLAFAAQKVVEVNALAKALSGAKDEAFFSANAAAQASRKSSPRVTNEAVQ…
4538.I1R803	Oryza glaberrima	Land Plants	MASHIVGYPRMGPKRELKFALESFWDGKSSAEDLEKVATDLRASIWKQMADAGIKYIPSNTFSYYDQVLDTTAMLGAVPERYSWTGGEIGFSTYFSMARGNATVPAMEMTKWFDTNYHFIVPELGPNTKFSYSSHKAVNEYKEAKALGVDTVPVLVGPVSYLLLSKPAKGVEKSFALLSLLSSILPVYEVIAELKAAGATWIQFDEPTLVLDLDSHQLAAFSAAYTELESALSGLNVLIETYFADIPAESYRTLTSLNSVTAYGFDLIRGAKTLDLIKSAGFPSGKYLFAGVVDGRNIWADDLAASLTTLESLEAIVGKDKLVVSTSCSLMHTAVDLVNETKLDSEIKSWLAFAAQKVVEVNALAKALAGQKDEAYFAANAAAQASRRSSPRVTNEEVQ…
4538.I1R804	Oryza glaberrima	Land Plants	VTILNWSFVRNDQPRFETCYQIALAIKKEVEDLEAGGIQVIQIDEAALREGLPLRKAEHAFYLDWAVHSFRITNCGVQDTTQQIHTHMCYSNFNDIIHSIINMDADVITIENSRSDEKLLSVFREGVKYGAGIGPGVYDIHSPRIPSTEEIADRVNKMLAVLDTNILWVNPDCGLKTRKYNEVKPALTNMVSAAKLIRTQLASAK
4538.I1R805	Oryza glaberrima	Land Plants	MASHIVGYPRMGPKRELKFALESFWDGKSSAEDLEKVATDLRASIWKQMADAGIKYIPSNTFSYYDQVLDTTAMLGAVPERYSWTGGEIGFSTYFSMARGNATVPAMEMTKWFDTNYHFIVPELGPNTKFSYSSHKAVNEYKEAKALGVDTVPVLVGPVSYLLLSKPAKGVEKSFALLSLLSSILPVYKEVIAELKAAGATWIQFDEPTLVLDLDSHQLAAFSAAYTELESALSGLNVLIETYFADIPAESYKTLTSLNSVTAYGFDLIRGSKTLDLVKSAGFPSGKYLFAGVVDGRNIWADDLAASLTTLESLEAIVGKDKLVVSTSCSLMHTAVDLVNETKLDSEIKSWLAFAAQKVVEVNALAKALAGQKDEAYFAANAAAQASRRSSPRVTNEEV…
4538.I1R806	Oryza glaberrima	Land Plants	VTILNWSFVRNDQPRFETCYQIALAIKKEVEDLEAGGIQSSCLRLFNCPLQVIQIDEAALREGLPLRKAEHAFYLDWAVHSFRITNCGVQDTTQTTFSRQIHTHMCYSNFNDIIHSIINMDADVITIENSRSDEKLLSVFREGVKYGAGIGPGVYDIHSPRIPSTEEIADRINKMLAVLDTNILWVNPDCGLKTRKYTEVKPALTNMVSAAKLIRTQLASAK
4558.A0A1B6PEC9	Sorghum bicolor	Land Plants	MASHIVGYPRMGPKRELKFALESFWDGKSTAEDLEKVATDLRASIWKQMADAGIKYIPSNTFSYYDQVLDTTAMLGAVPERYSWTGGEIGFDTYFSMARGNATVPAMEMTKWFDTNYHFIVPELGPNTKFSYASHKAVNEYKEAKALGVDTVPVLIGPVSYLLLSKPAKGVEKGFPLLSLLSSILPVYKEVIAELKAAGASWIQFDEPTLVLDLDSNKLAAFSAAYAELESALSGLNVLVETYFADVPAESYKTLTSLSGVTAYGFDLVRGTQTLGLVTSAGFPAGKYLFAGVVDGRNIWADDLATSLSTLQSLEAVVGKDKLVVSTSCSLMHTAVDLVNETKLDSEIKSWLAFAAQKVVEVDALAKALAGQKDEAYFAANAAAQASRKSSPRVTNEEV…
4558.A0A1B6QJ05	Sorghum bicolor	Land Plants	MASHIVGYPRMGPKRELKFALESFWDGKSSAEDLEKVATDLRSSIWKQMSEAGIKYIPSNTFSYYDQVLDTTAMLGAVPERYSWTGGEIGLSTYFSMARGNATVPAMEMTKWFDTNYHFIVPELGPSTKFTYASHKAVSEYKEAKALGIDTVPVLVGPVSYLLLSKPAKGVEKSFSLLSLLGSILPIYKEVVAELKAAGASWIQFDEPTLVKDLDAHELAAFSSAYAELESAFSGLNVLIETYFADIPAESYKTLTSLSGVTAYGFDLIRGAKTLDLIRSSFPSGKYLFAGVVDGRNIWADDLAASLSTLQSLEAVAGKDKLVVSTSCSLMHTAVDLVNETKLDDEIKSWLAFAAQKVVEVNALAKALAGQKDEAYFAANAAAQASRRSSPRVTNEEVQ…
4577.A0A1D6GL75	Zea mays	Land Plants	MKFRPQNFVSSRTGFPKLLLHLLENLEFLHRKMASHIVGYPRMGPKRELKFALESFWDGKSSAEDLEKVATDLRSSIWKQMSEAGIKYIPSNTFSYYDQVLDTTAMLGAVPERYSWTGGEIGLSTYFSMARGNATVPAMEMTKWFDTNYHFIVPELGPSTKFTYASHKAVSEYKEAKALGIDTVPVLVGPVSYLLLSKPAKGVEKSFSLLSLLGSILPIYKEVVAELKAAGASWIQLDEPTLVKDLDAHELAAFSSAYAELESSFSGLNVLIETYFADIPAESYKTLTSLSGVTAYGFDLIRGAKTLDLIRSSFPSGKYLFAGVVDGRNIWADDLAASLSTLHSLEAVAGKDKLVVSTSCSLMHTAVDLVNETKLDDEIKSWLAFAAQKVVEVNALAKA…
4577.B6UF55	Zea mays	Land Plants	MASHIVGYPRMGPKRELKFALESFWDGKSSADDLEKVASDLRSSIWKQMSEAGIKYIPSNTFSYYDQVLDTTAMLGAVPERYSWTGGEIGLSTYFSMARGNATVPAMEMTKWFDTNYHFIVPELGPSTKFTYASHKAVSEYKEAKALGIDTVPVLVGPVSYLLLSKPAKGVEKSFSLLSLLGSILPIYKEVVSELKAAGASWIQFDEPTLVKDLDVHELAAFSSAYAELESAFSGLNVLIETYFADIPAESYKTLTSLSGVTAYGFDLIRGAKTLDLIRSSFPSGKYLFAGVVDGRNIWADDLAASLSTLQSLEAVAGKDKLVVSTSCSLMHTAVDLVNETKLDDEIKSWLAFAAQKVVEVNALAKALAGQKDEAYFAANAAAQASRRSSPRVTNEEVQ…
4577.C0P5Y3	Zea mays	Land Plants	MASHIVGYPRMGPKRELKFALESFWDGKSTAEDLEKVATDLRASIWKQMADAGIKYIPSNTFSYYDQVLDTTAMLGAVPERYSWTGGEIGFDTYFSMARGNATVPAMEMTKWFDTNYHFIVPELGPNTKFSYASHKAVNEYKEAKALGVDTVPVLVGPVSYLLLSKPAKGVEKGFPLLSLLSSILPVYKEVIAELKAAGASWIQFDEPTLVLDLDSDKLAAFSAAYAELESVLSGLNVLVETYFADVPAESYKTLTSLSSVTAYGFDLVRGTQTLGLVTSAGFPAGKYLFAGVVDGRNIWADDLATSLSTLQSLEAVVGKDKLVVSTSCSLMHTAVDLVNETKLDSEIKSWLAFAAQKVVEVDALAKALAGQKDEAYFAANAAAQASRKSSPRVTNEEV…
39946.A2ZMX3	Oryza sativa Indica Group	Land Plants	MASHIVGYPRMGPKRELKFALESFWDGKSSAEDLEKVATDLRASIWKQMADAGIKYIPSNTFSYYDQVLDTAAMLGAVPERYSWTGGEIGFSTYFSMARGNATVPAMEMTKWFDTNYHFIVPELGPNTKFSYSSHKAVNEYKEAKALGVDTVPVLVGPVSYLLLSKPAKGVEKSFALLSLLSSILPVYKEVIAELKAAGATWIQFDEPTLVLDLDSHQLAAFSAAYTELESALSGLNVLIETYFADIPAESYKTLTSLNSVTAYGFDLIRGAKTLDLIKSAGFPSGKYLFAGVVDGRNIWADDLAASLTTLESLEAIVGKDKLVVSTSCSLMHTAVDLVNETKLDSEIKSWLAFAAQKVVEVNALAKALAGQKDEAYFAANAAAQASRRSSPRVTNEEV…
39946.B8BN41	Oryza sativa Indica Group	Land Plants	MASHIVGYPRMGPKRELKFALESFWDGKSSAEDLEKVATDLRASIWKQMADAGIKYIPSNTFSYYDQVLDTTAMLGAVPERYSWTGGEIGFSTYFSMARGNATVPAMEMTKWFDTNYHFIVPELGPNTKFSYSSHKAVNEYKEAKALGVDTVPVLVGPVSYLLLSKPAKGVEKSFALLSLLSSILPVYKEVIAELKAAGATWIQFDEPTLVLDLDSHQLAAFSAAYTELESALSGLNVLIETYFADIPAESYKTLTSLNSVTAYGFDLIRGSKTLDLVKSAGFPSGKYLFAGVVDGRNIWADDLAASLTTLESLEAIVGKDKLVVSTSCSLMHTAVDLVNETKLDSEIKSWLAFAAQKVVEVNALAKALAGQKDEAYFAANTAAQASRRSSPRVTNEEV…
43335.A0A4U5NJJ0	Populus alba	Land Plants	MNRFSHHILAPFSSHRVISLRSLSFSTSFTATNSHSPPSLIRFSFRTFSISAMASHIVGYPRMGPKRELKFALESFWDGKSSAEDLQKVAADLRSSIWKQMTDAGIKFIPSNTFSCYDQVLDTTAMLGAVPPRYGWNGGEIGFDVYFSMARGNASVPAMEMTKWFDTNYHYIVPELGPEVNFSYASHKAVNEYKEAKALGVDTVPVLVGPVSYLLLSKPAKGVEKSFSLLSLIDKILPVYQEVLAELKAAGASWIQFDEPKLVMDLGANELQAFTHAYSALETSLSGLNVLVETYFADVPVEAYKTLTSLKSVTGFGFDLVRGTKTLELIKGGFPSGKYLFAGVVDGRNIWANNLASSLDTLKALEGIVGKDKLVVSTSCSLLHTAVDLVNEPKLDKEI…
43335.A0A4U5P3N8	Populus alba	Land Plants	MASHIVGYPRMGPKRELKFALESFWDGKSSAEDLQKVAADLRESIWKQMTDAGIKYIPSNTFSYYDQMLDTTAMLGAVPPRYGWNGGEIGFDVYFSMARGNASVPAMEMTKWFDTNYHFIVPELGPDVNFSYASHKAVTEYKEAKALGVDTIPVLIGPVSYLLLSKPAKGVEKTFSLLSLLGKILPIYKEVISELKEAGASWIQFDEPTLVMDLESHKLEAFTEAYSELESTVSGLNVLIETYFADIPAKQYKTLTSLKGVTALGFDLVRGTKTLDLIKGEFPKGKYLFAGVVDGRNIWANDLAASLSTLEALEGIVGKDKLVVSTSCSLLHTAVDLVNETKLDKEIKSWLAFAAQKVLEVNALAKALAGEKDEEFFSANVAAHTSRKSSPRVNNEAVQ…
43335.A0A4U5PXN9	Populus alba	Land Plants	MASHIVGYPRMGPKRELKFALESFWDGKSSAEDLQKVSADLRESIWKQMADTGIKYIPSNTFSYYDQMLDTTAMLGAVPPRYGWNGGEIGFDVYFSMARGNASVPAMEMTKWFDTNYHFIVPELGPDVKFSYASHKAVTEYKEAKALGVDTVPVLIGPVSYLLLSKPAKGVEKSFSLLSLLGKILPIYKEVISELKEAGASWIQFDEPTLVMDLESHKLQAFTEAYSALESTLSGLNVLIETYFADIPAEQYKTLTSLKGVNAFGFDLVRGTKTLDLIKGDFPKGKYLFAGVVDGRNIWANDLAASFSTLQTLEGIVGKDKLVVSTSCSLLHTAVDLVNETKLDKEIKSWLAFAAQKVVEVNALAKALAGQKDEEIFSANAAALASRKSSPRVTNEAVQ…
43335.A0A4V5ZZ64	Populus alba	Land Plants	MNQVSQHILAPFTSLRVISVGSLSFPSSLTTTNSNSPPFLLRYFSVRAMASHVVGYPRMGPKRELKFALESFWDGKSSAEDLQNVAADLRSSIWKQMSDAGIKFIPSNTFSCYDQVLDTTAMLGAVPPRYGWNGGEIGFDVYFSMARGNASVPAMEMTKWFDTNYHYIVPELGPEVNFSYASHKAVIEYKEAKALGVDTVPVLVGPVSYLLLSKPAKGVEKSFSVLSLIDKILPVYQEVVAELKAAGATWIQFDEPKLVMDLGAHELQAFTHAYSALEASLSGLNVLIETYFADVPVEAYKTLISLKSVTGFGFDLVRGTKTLDLIKGGFPSGKYLFAGVVDGRNIWANDLASSLGVLHALEGIVGKDKLVVSTSCSLLHTAVDLVNEPKLDKEIKSWL…
51351.M4CA61	Brassica rapa subsp. pekinensis	Land Plants	MASHIVGYPRMGPKRELKFALESFWDGKSTADDLKKVSADLRSDIWKQMSAAGIKYIPSNTFAYYDQVLDTTAMLGAVPPRYGWNSGEIGFDVYFSMARGNASVPAMEMTKWFDTNYHYIVPELGPEVKFSYASHKAVNEYKEAKALGAETVPVLVGPVSYLLLSKLAKGVDKSFDLLSLLPKILPIYKEVIEELKGAGATWIQFDEPLFVMDLEGHKLQAFSGAYAELESTLSGLNVLVETYFADVPAEAYKTLTSLKGVTAFGFDLIRGTKTIDLIKSSFPEGKYLFAGVVDGRNIWANDLAASLITLQSLEGVVGKGIVSTCDPLNLSLTRCLYYLCIGADKLVVSTSCSLLHTAVDLVNETKLDAEIKSWLAFAAQKVVEVDALAKALAGQTNQS…
51351.M4CD35	Brassica rapa subsp. pekinensis	Land Plants	MASHIVGYPRMGPKRELKFALESFWDGKSTAEDLQKVSADIRSGIWKQMSEAGTKYIPSNTFAHYDQVLDTTAMLGAVPPRYGYTSGEIGLDVYFSMARGNASVPAMEMTKWFDTNYHYIVPELGPDVKFSYASHKAVNEYKEAKALGVDTVPVLVGPVSYLLLSKAAKGVEKSFDLLSLLPKILPVYKEVITELKAAGATWIQLDEPVLVMDLEGHKLQAFTGAYAELESTLSGLNVLVETYFADIPAEAYKTLTSLKGVTAFGFDLVRGTKTLDLVKAGFPEGKYLFAGVVDGRNIWANDFAASLSTLEALEGVVGKDKLVVSPSCSLLHTAVDLVNETKLDDEIKSWLAFAAQKIVEVNALAKALAGQKDEALFSANAAALASRRSSPRVTNEGVQ…
51351.M4CDR8	Brassica rapa subsp. pekinensis	Land Plants	MDPNKSTHLQMARSGNGSRGQKIDLLTNHFGVNFTTSKSQHFFQYSVAITYEDGNPVEAKGIGRKILAKVQETYQTDLGSKHFAYDGDKILFTVGPLPNNKLDFSVVLEDMSCTRSNTSTSDANTKRLRPHNQSKRFNVAISFAAKISMQAIQGALQGKETNDLQDAVRVLDVILRQNAATKGCLLVRQSFFHNDAKYFSNNHGGFHLCRGFHSSFRATQGGLSLNIDVSSTLIVSPGPVIDFLVLNQEVRDPSSIDWKKAERTLKNLRVKVDPSNREYKITGLTRLPCRDQTFLWKKKQGNGETKEVEVTVYDYFTKHLEIELRHSGGLPCISVGKPKRPTYFPIEQCHLVSLQRYTKAPTIFQRSKLVKESVQKPQEKMNVLNNAIKDSGYNNDPML…
51351.M4CQE0	Brassica rapa subsp. pekinensis	Land Plants	MASHIVGYPRMGPKRELKFALESFWDKKSTAEDLQKVSADIRSGIWKQMSEAGTKYIPSNTFAHYDQVLDTTAMLGAVPPRYGYTGGEIGLDVYFSMARGNASVPAMEMTKWFDTNYHYIVPELGPEVNFSYASHKAVNEYKEAKALGVDTVPVLVGPVSYLLLSKAAKGVEKSFDLLSLLPKILPVYKEVITELKAAGATWIQLDEPVLVMDLEGHKLQAFTGAYAELESTLSGLNVLVETYFADIPAEAYKTLTSLKGVTAFGFDLVRGTKTLDLVKAGFPEGKYLFAGVVDGRNIWANDFAASLSTLEALEGVVGKDKLVVSTSCSLLHTAVDLVNETKLDDEIKSWMAFAAQKVVEVNALAKALAGQKDEALFSANAAALASRRSSPRVTNEGVQ…
51351.M4CQU8	Brassica rapa subsp. pekinensis	Land Plants	MGQLALQRVSPLPSLPRRLPSLPPPSSYSPSLLFATASRRPRRHGFYLVRAMSSHIVGYPRIGPKRELKFALESFWDGKTAANDLQTVAANLRNSIWKHMADAGIKYIPSNTFSYYDQMLDTTAMLGAVPSRYGWKSGEIGFDVYFSMARGNDSVPAMEMTKWFDTNYHYIVPELGPDVEFSYASHKAVDEFKEAKALGIDTVPVLIGPITYLLLSKPAKGVDKSFCLLSLIDKILPIYKEVFDDLKSAGARWIQFDEPILVMDLDTNQLQAFSDAYSHMESSLAGLNVLIATYFADVPAEAYKTLTSLKCVTGFGFDFVRGLETLDLIKGGFPRGKLLFAGVVDGRNIWANDLSASLKTLQSLEEIVGKDKVVVSTSCSLLHTAVDLVNEVKLDKELK…
51351.M4E4E2	Brassica rapa subsp. pekinensis	Land Plants	MASHIVGYPRMGPKRELKFALESFWDGKSTAEDLQKVSADLRSAIWKQMSEAGTKYIPSNTFAHYDQVLDTTAMLGAVPPRYGYTGGEIGLDVYFSMARGNASVPAMEMTKWFDTNYHYIVPELGPEVNFSYASHKAVNEYKEAKALGVETVPVLVGPVSYLLLSKAAKGVEKSFDLLSLLPKVLAVYKEVITELKAAGATWIQLDEPVLVMDLEGHKLEAFTAAYAELESTLSGLNVLVETYFADIPAEAYKTLTSLKGVTAYGFDLVRGTKTLDLVKASFPAGKYLFAGVVDGRNIWANDFAASLSTLQELEGVVGKDKLVVSTSCSLLHPAVDLVNETKLDDEIKSWLAFAAQKVVEVNALAKALAGQKDEALFSANAAALASRRSSPRVTNEGVQ…
81972.D7KMU6	Arabidopsis lyrata subsp. lyrata	Land Plants	LFAGVVDGRITWANDFAASLSTLQALEDIVGNDKLVVSTSCSLLHTAVDLINETKLDDEIKSWLAFAAQKVVEVIALAKALAGQKDEALFSANAATLASRRFSPKSHQQGCSEGRCCFEGI
81972.D7L198	Arabidopsis lyrata subsp. lyrata	Land Plants	MASHIVGYPRMGPKRELKFALESFWDGKSTAEDLQKVSADLRSDIWKQMSAAGIKYIPSNTFSHYDQVLDTTAMLGAVPPRYGFTSGEIGLDVYFSMARGNASVPAMEMTKWFDTNYHYIVPELGPEVKFSYASHKAVNEYKEAKALGVETVPVLVGPVSYLLLSKLAKGVDKSFDLLSLLPKILPVYKEVIAELKAAGASWIQLDEPLFVMDLEGQKLQAFSGAYAELESTLSGLNVLVETYFADIPAEAYKTLTSLKGVTAFGFDLVRGTKTIDLIKAGFPQGKYLFAGVVDGRNIWANDLAASLITLQSLEGVVGKDKLVVSTSCSLLHTAVDLVNETKLDAEIKSWLAFAAQKVVEVDALAKALAGQTNESFFTANADALSSRRSSPRVTNESVQ…
81972.D7LXP0	Arabidopsis lyrata subsp. lyrata	Land Plants	MASHIVGYPRMGPKRELKFALESFWDGKSTAEDLQKVSADLRSSIWKQMSAAGTKFIPSNTFAHYDQVLDTTAMLGAVPPRYGYTGGEIGLDVYFSMARGNASVPAMEMTKWFDTNYHYIVPELGPEVNFSYASHKAVNEYKEAKALGVDTVPVLVGPVSYLLLSKAAKGVDKSFDLLSLLPKILPIYKEVITELKAAGATWIQLDEPVLVMDLEGHKLQAFTGAYAELESTLSGLNVLVETYFADIPAEAYKTLTSLKGVTAFGFDLVRGTKTLDLVKAGFPEGKYLFAGVVDGRNIWANDFAASLSTLQALEGIVGKDKLVVSTSCSLLHTAVDLINETKLDDEIKSWLAFAAQKVVEVNALAKALAGQKDEALFSANAAALASRRSSPRVTNEGVQ…
81972.D7M065	Arabidopsis lyrata subsp. lyrata	Land Plants	MGQLALQRLPPLASLPRRPPSLPPPSLPCATVSRRPLRPGFYVARAMSSHIVGYPRIGPKRELKFALESFWDGKTSVDDLQNVAANVRKSIWKHMADTGIKYIPSNTFSYYDQMLDTTAMLGAVPSRYGWESGEIGFDIYFSMARGNASAHAMEMTKWFDTNYHYIVPELGPNVKFSYASHKAVVEFKEAKALGIDSVPVLIGPMTYLLLSKPAKGVDKSFCLLSLIDRILPVYKEVLADLKSAGARWIQFDEPILVMDLDTSQLQAFSDAYSYMESSLAGLNVLIATYFADVPAESYKTLMSLKCVTGFGFDLVRGLETLDLIKMNFPRGKLLFAGVVDGRNIWANDLSASLKTLQTLEDIVGKEKVVVSTSCSLLHTAVDLVNEIKLDKELKSWLAF…
214687.M0SQW0	Musa acuminata subsp. malaccensis	Land Plants	MQRIRSAAAVSPSISTGINLLLRSRLSSSHLCRALLGDRFLLRARRKMASHIVGYPRMGPKREIKFALESFWDGKSSADDLQKVATDLRCSIWKQMTDVGIKYIPSNTFSYYDQVLDATAMLGAVPERYNYTGGEIGFDIYFSMARGNASVPAMEMTKWFDTNYHFIVPELGPNTKFSYSSHKAVSEYKEAKALGIETIPVLIGPVTYLLLSKPAKGVEKSFAPLSLLESILPIYKEVIAELKAAGASWIQFDEPTLVLDLESHQLEAFTKAYTELESSLSGLNVLIETYFADVPAEAYKIITALKGVSGFGFDLIRGAKTLDLVKSAGFPAGKYLFAGVVDGRNIWANDLASSFSTLQALEAIVGKDKLVVSTSCSLMHTAVDLVNETKLDNEIKSWL…
214687.M0SR82	Musa acuminata subsp. malaccensis	Land Plants	MARGNASVPAMEMTKWFDTNYHFIVPELGPNTKFSYSSHKPVSEYKEAKALGIETVPVLIGPVTYLLLSKPAKGVEKSFSPLSLLGSILPIYKEVIAELKAAGASWIQFDEPTLVMDLESHQLEAFTKAYTELESSLSGLNVLAETYFADVPPEAYKTITALKSISGFGFDLVRGTKTLDLVKSAGFPAGKYLFAGVVDGRNIWANDLASSISTLETLEAIVGKDKLVVSTSCSLMHTAVDLVNETKLDSEIKSWLAFAAQKVVEVNALAKALAGQKDEAFFSANAAAQASRKSSPRVTNEEVQKAAAALKGSDHRRATNVSARLDAQQKKLNLPILPTTTIGSFPQTMDLRRVRREYKANKISEEEYVKAIKEEISKVVKLQEELDIDVLVHGEPERN…
214687.M0SV53	Musa acuminata subsp. malaccensis	Land Plants	MARGNASVPAMEMTKWFDTNYHFIVPELGPNTKFTYSSHKALSEYKEAKALGIETVPVLIGPVTYLLLSKPAKGVEKSFSPLSLLGNILPIYKEVTAELKAAGASWIQFDEPTLVMDLESHQLEAFTKAYTELESSLSGLNVLIETYFADVPAEAYKTITALKGISGVGLDLIRGTKTLDLVKSAGFPAGKYLFAGVVDGRNIWANDLASSLSTLQALEAIVGKDKLVVSTSCSLMHTAVDLVNETKLDSEIKSWLAFAAQKVVEVNALAKALAGQKDEAFFSANVAAQSSRKSSPRVTNEEVQKAAAALKGSDHRRVTNVSARLDAQQKKLNLPILPTTTIGSFPQTMDLRRVRRECKANKISEEEYVKAIKEEISKVVKLQEELDIDVLVHGEPERN…
214687.M0TDU3	Musa acuminata subsp. malaccensis	Land Plants	MASHIVGYPRMGPKRELKFALESFWDKKSSADDLQKVATDLRHSIWKQMAGAGIKHIPSNTFSYYDQVLDTTAMLGAVPERYNFTGGEIGFDTYFSMARGNASVPAMEMTKWFDTNYHFIVPELGPTTKFSYSSHKPVSEYKEAKSLGIETVPVLIGPVTYLLLSKPAKGVEKSFSPLTLLGDILPIYKEVITELKAAGASWIQFDEPTLVKDLESHQLEAFTKAYTELESSLSGLNVLVETYFADVPAEAYKTITALKSISGFGFDLVRGTKTLDLVKSVGFPAGKYLFAGIVDGRNIWANDLASSLSTLQALEAIVGKDKLVVSTSCSLMHTAVDLINETKLDSEIKSWLAFAAQKVVEVNALAKALADQKDEAFFSANAAAQASRKSSPRVTNEEV…
556484.B7G1X4	Phaeodactylum tricornutum CCAP 1055/1	Diatom	MKITTTATLGFPRMGPNRELKFALEKHWKGSLSEVDLIKVSEDVETMGWKLQKEAGIDLITVGDMYLYDCVLFWIESLGIVPHRFENLAAGTTRMFSMARGVDGAEALSMKKWITSNYHYMVPEFDKSSKIAPDFSSFISSVERGVGVLGAECAIPVVLGPVSICFFARIVDDALTTHELIALLIPVYKTLLQKVADLGVKEIQIHEPAIVLEEVGLIASLKTVYPAILPKGPKINFVTAMDDVGKANYDWLISESNGLNILSMDFTRGNTLGLIEKRGFPSSKMLGAGLVDARNVWKVDPGKVLPLTDKLKSLGIEFRVQPSTSLQYTPWDLDREMQLDNHPAAQVLSFAKQKLDELVLLAQAISGEKSALDTHTAAWTTFHSAHTGSTLTKERIKHL…
MHU86_2182.1	Fragilaria crotonensis	Diatom	MKVSSTSTLGFPRMGPNRDLKFALEKYWKGLIKEKALADIVASIEDQAWALQKAAGVDRITVGDHYLYDGILTWTEYLGVIPARHKHLKAGLTRMFAMARGVDGATALSMKKWITSNYHYMVPEFDGTINADFSSFYAEVGRGLNVLGARCATPVIIGPVTMAYLTKFASFSTGYEAQERLSFLVQLLPIYKKLLGDLAAMGFDEIQIHEAALVMEDPYLLEYFNLAYPAILLDGPAINMVSFMEDVGEKHYEWLISVDRVSIVSLDFTRGENLIFMEKHGFPTTKTLGAGLVDSRSVWCVDPSIIKPVLDRLAQVINDSPIRIQPSGSLQYNPWDLSCETELLAHPAGQVLSFAAQKLGEVRALADAVNKGWSLLDGANWTNYRAAVVNGSNPDVRNR…
P9211_08871	Prochlorococcus marinus	Cyanobacteria	MDFINHLKKRNTILVFDGGMGTALQLQELSKEDFGGSQFEGCNEYLLISNPKSVEKVHRSYLEVGCDVIETNTFGATSVVLAEYGLENKAYQLNLAASKMAKTLAKEYSTINKPRYAAGSIGPTTKLPTLGHIDFDDLTNSYQEQVEALITGGIDLVLVETCQDVLQIKSALLAISLAEKSLGIKIPVMVSITMETTGTMLIGTEISAALTILEPFNIDILGLNCATGPEEMKSHIQYLSSHSPFITSCIPNAGLPENIGGKAHYRLTPIELKMQLMHFIKDLGVKVIGGCCGTTPEHIKGLTQLVEEITNSNDQNLPSIKKIATQPSASSIYEKISYQQDNSFLIVGERLNASGSKKVRELLNKDDWDGLVSLAKGQLKENAHILDVNVDYVGRDGVA…
syc0184_c	Synechococcus elongatus	Cyanobacteria	MQSLFLDRLHSPERPVLVFDGGMGTTLQFQNLTAEDFGGPETEGCNEWLIRTKPEAIATVHRQFLEAGADVIETDTFGATTIVLAEYGLEDHAYALNVEAAKLAKAIAAEFSTPEKPRFVAGSMGPTTKLPTLGHIGYDEMKASFAEQARGLWEGGVDLFIVETCQDVLQIKAALNGIAEIFSEKGDRRPLMVSVTMETTGTMLVGSDVAAMLAILEPYPIDILGLNCATGPDRMVEHIKYLSEHSPFVISCIPNAGIPENVGGHAHYRLTPMELRMALHRFVEDLGVQVIGGCCGTKPEHIAQLAEVATQLQAKDRPVRRDRDHQQRQPFNYVPSAASIYGTTPYIQDNSFLIIGERLNASGSKKVRELLNEEDWDGLVAIARSQVKEGAHVLDVNVD…
