# Supplementary material for: The ‘Photosynthetic C1 pathway’ links carbon assimilation and growth in plants
Source: Research Square preprint supplement (doi:10.21203/rs.3.rs-4116025/v1), 2024-04-19
Supplement: Supplementary file 2 [file 4d2dd29d0938261ce09c915d.xlsx]

## Sheet: Sheet1
Mass spectrometer parameters			LC parameters
	Instrument	Thermo Q Exactive	LC stack:	Agilent 1290 UHPLC Infinity I
	data acquisition mode	Full MS -> ddMS2	Autosampler temperature:	4 degrees C
	ion polarity mode	injected 2x: first in positive mode, then in negative mode	Needle wash:	3 seconds, mode = flush port using 50:50 v/v methanol:water
Source settings			Injection notes:	samples injected twice at 3uL (once in each ion polarity mode) followed by a solvent blank
	Sheath gas flow rate	55	Control notes:	Internal (in all samples) and external (injected every 10 samples) standards were used for quality control purposes; samples injected in random order
	Aux gas flow rate	20	Chromatography
	Sweep gas flow rate	2	Column Manufacturer:	Agilent
	Spray voltage ( |kV| )	3	Column Model:	683775-924
	Capillary temp. (degrees C)	400	Column Description:	InfinityLab Poroshell 120 HILIC-Z, 2.1 × 150 mm, 2.7 µm
	S-lens RF level	50	Composition of mobile phase solvent A:	5mM ammonium acetate, 5uM methylene di-phosphonic acid in 99.8:0.2 v/v water:acetic acid
FULL MS settings			Composition of mobile phase solvent B:	5mM ammonium acetate in 95:4.8:0.2 v/v acetonitrile:water:acetic acid
	resolution	70000	Column compartment temperature:	held at 40 degrees C
	AGC target	3000000	Timetable:	Time	Flow (mL/min)	%A	%B
	Max. IT	100ms		0	0.45	0	100
	Scan range	70-1050 m/z		1	0.45	0	100
	Spectrum data type	Centroid		11	0.45	11	89
dd-MS2 settings				15.75	0.45	30	70
	resolution	17500		16.25	0.45	80	20
	AGC target	100000		18.5	0.45	80	20
	Max. IT	50 ms		18.6	0.45	0	100
	Loop count	2		21	0.45	0	100
	TopN	2	Internal standards
	isolation window (m/z)	1	Component name	Vendor	Product SKU	Concentration
	(N)CE /stepped nce	10,20,40	13C-15N-thymine	CIL	CNLM-6945-PK	2.5 ug/mL
	Spectrum data type	Centroid	15N-inosine	CIL	NLM-4264-PK	5.5 ug/mL
dd settings			15N-adenine	CIL	NLM-6924-PK	4 ug/mL
	Min. AGC target	1000	15N-guanine	CIL	NLM-6925-PK	3 ug/mL
	Charge exclusion	>3	15N-hypoxanthine	CIL	NLM-8500-PK	3 ug/mL
	Exclude isotope	on	13C-15N-uracil	CIL	CNLM-3917-PK	2 ug/mL
	Dynamic exclusion	7 seconds	13C-15N-cytosine	Sigma-Aldrich	492108-10MG	5 ug/mL
			9-anthracene carboxylic acid	Sigma-Aldrich	A89405-25G	5 ug/mL
			3,6-Dihydroxy-4-methylpyridazine	Sigma-Aldrich	CDS014672-100MG	5 ug/mL
			2-amino-3-bromo-5-methylbenzoic acid	Sigma-Aldrich	R435902-250MG	5 ug/mL
